# Supplementary material for: Global analysis of ocean phytoplankton nutrient limitation reveals high prevalence of co-limitation
Source: PubMed Central journal article supplement (PMC10435517; doi:10.1038/s41467-023-40774-0), 2023-08-17
Supplement: 41467_2023_40774_MOESM1_ESM.pdf [file 41467_2023_40774_MOESM1_ESM.pdf]

## **Supplementary Text 1**

Correlation statistics using the maximum observed chlorophyll-a based growth rate (i.e., the growth rate for treatment with strongest positive response) across all experiments as the response variable showed significant correlations with chlorophyll-a (Chl),  $\log_{10}(\text{Chl})$ , Temperature, and Latitude (Table S1). Correlations with Chl,  $\log_{10}(\text{Chl})$  were furthermore stronger for data where at least 2 nutrients were added as response variable (i.e., where the potential for remaining nutrient limitation to be suppressing the observed maximum growth rate is reduced) (Table S2).

**Table S1.** Correlation statistics using the maximum observed chlorophyll-a based growth rate (i.e., the growth rate for treatment with strongest positive response) across all experiments as response variable.

|                              | <b>Spearman r</b> | <b>Pearson r</b> | <b>p</b>              | <b>n</b> |
|------------------------------|-------------------|------------------|-----------------------|----------|
| <b>Chl</b>                   | -0.405            | -0.285           | 0.0036                | 103      |
| <b>Log<sub>10</sub>(Chl)</b> | -0.405            | -0.621           | $2.6 \times 10^{-12}$ | 103      |
| <b>Temperature</b>           | 0.445             | 0.506            | $5.0 \times 10^{-8}$  | 103      |
| <b>Latitude</b>              | -0.308            | -0.411           | $1.6 \times 10^{-5}$  | 103      |

**Table S2.** Correlation statistics using maximum observed chlorophyll-a based growth rate in all experiments where at least 2 nutrients were added as response variable (i.e., where the potential for remaining nutrient limitation to be suppressing the observed maximum growth rate is reduced).

|                              | <b>Spearman r</b> | <b>Pearson r</b> | <b>p</b>              | <b>n</b> |
|------------------------------|-------------------|------------------|-----------------------|----------|
| <b>Chl</b>                   | -0.472            | -0.292           | 0.0136                | 71       |
| <b>Log<sub>10</sub>(Chl)</b> | -0.472            | -0.650           | $8.6 \times 10^{-10}$ | 71       |
| <b>Temperature</b>           | 0.413             | 0.445            | $1.0 \times 10^{-4}$  | 71       |
| <b>Latitude</b>              | -0.199            | -0.320           | 0.0065                | 71       |

Stepwise linear regression with  $\log_{10}(\text{Chl})$ , Temperature and Latitude as predictors only returned  $\log_{10}(\text{Chl})$  as a significant predictor (i.e., no more variance was explained at  $p < 0.05$  by adding in temperature or latitude). Stepwise linear regression with Chl, Temperature and Latitude as predictors only returned Temperature as significant predictor (i.e., no more variance explained at  $p < 0.05$  by adding in Chl or latitude).

When the temperature normalised maximum growth rate observed in each experiment was used as the response variable (see Methods), neither Chl (or  $\log_{10}(\text{Chl})$ ) or Latitude were significantly correlated (i.e., residuals following temperature normalisation were not correlated with Chl or  $\log_{10}(\text{Chl})$ ).
