# Supplementary material for: Global analysis of ocean phytoplankton nutrient limitation reveals high prevalence of co-limitation
Source: PubMed Central journal article supplement (PMC10435517; doi:10.1038/s41467-023-40774-0), 2023-08-17
Supplement: 41467_2023_40774_MOESM3_ESM.pdf [file 41467_2023_40774_MOESM3_ESM.pdf]

## **Description of additional supplementary files**

Supplementary Data 1: The compiled experimental dataset.
